# Supplementary material for: (−)-Epicatechin exerts positive effects on anxiety in high fat diet-induced obese mice through multi-genomic modifications in the hippocampus
Source: Royal Society of Chemistry journal article supplement (doi:10.1039/d2fo01897g), 2022-01-01
Supplement: d2fo01897g1.xlsx [file d2fo01897g1.xlsx]

## Sheet: HF vs C
43 common in mRNA, miRNA target, and lncRNA target	173 common in mRNA and miRNA target	280 common in miRNA target and lncRNA target	190 common in mRNA and lncRNA target
Stat1	Ly96	1810030O07Rik	Gm5415
Crp	Plcl1	4931428F04Rik	Irs1
Bpnt1	Fzd7	4933427D06Rik	Glrp1
Prrc2b	Slc11a1	5730455P16Rik	Olfr1410
Itpripl1	Sp110	6030458C11Rik	D1Ertd622e
4921509C19Rik	Zfp648	9330159F19Rik	Tnfrsf11a
Tyw3	Cnih4	A130010J15Rik	Mgat5
Aqp7	Tgfb2	A430033K04Rik	Cdk18
Gmeb1	Rcor3	Aak1	Tnr
Runx3	Cdnf	Acer1	Akt3
Tmem88b	Tmem236	Acsm2	Il1f5
Paxip1	Man1b1	Akap2	Psd4
Fbxo21	Dnlz	Akap5	Ccdc187
Lrrc61	Zeb2	Ap1s3	Fam163b
Mrpl35	Tnfaip6	Ap3s2	Chst1
Hist4h4	Csrnp3	Arf3	Alx4
Slc8a2	Lrp4	Asah2	Gm17555
Ceacam20	Rpusd2	Asb13	Lzts3
Ceacam1	Lcmt2	Asxl2	Erv3
Kcnc3	Bloc1s6	Atf1	Gm14151
Nav2	Prnd	Bach2	Gm14147
Ntrk3	Rbbp9	Bcl2l11	Bpifb4
Xylt1	Zfp931	Birc5	Ncoa6
Ncan	Rbbp8nl	Bri3bp	Rbpjl
Chst2	Ptk6	Camk4	Dok5
Ccr9	Gm5148	Car10	Zfp831
Phactr2	Ndufc1	Car5b	Pag1
Onecut3	B3galnt1	Ccdc127	Maml3
Celf5	Isg20l2	Cd274	Nes
Synrg	Dennd4b	Cd33	Gatad2b
Neurod2	Gja5	Cdc14b	Wdr77
Rapgefl1	Clvs1	Cdc37	Celsr2
Cd300a	Palm2	Cep97	Tmem8b
Zmiz1	Jun	Cflar	Tal2
Pacsin2	Faah	Cir1	Pakap
Atf7	Mmachc	Coa5	Atg4c
Rab11b	Man1c1	Col22a1	Lrp8
Tmem151b	Tmem50a	Cx3cr1	Arid1a
Sema6a	Ski	Cxcr2	Ephb2
Ctif	Agrn	Cybrd1	Tmem214
Wbp1l	Isg15	Cyld	Sorcs2
Tcf7l2	Fosl2	Cytip	Bmp3
Snx12	Nat8l	D17H6S53E	Ssh1
	Ppp2r2c	Dennd5b	Rab35
	Bend4	Desi2	Ksr2
	Git2	Dhdh	Nos1
	Gatc	Draxin	Tbx5
	P2rx7	Drp2	Ncor2
	Pitpnm2	Dusp8	Glt1d1
	Tyw1	Dzank1	Mmp17
	Auts2	E2f1	Gjc3
	Uncx	Ece1	Smok3a
	Foxk1	Ehbp1l1	Nxpe5
	Kl	Eif4g2	Wasf3
	D630045J12Rik	Elfn1	Opn1sw
	Ggcx	Elovl7	Plxna4
	Dqx1	Enah	Sspo
	Cpne9	Epas1	Sftpb
	Mbd4	Fam107a	Wdr54
	Gdf3	Fam122b	Stambp
	Ffar3	Fam198b	D6Ertd527e
	Cd22	Fam212b	Cacna1c
	Dpy19l3	Fbxl18	Kcna6
	Zfp507	Fbxo43	Ddx47
	Iglon5	Foxj3	Pirb
	Fam169b	Fyco1	Leng8
	Man2a2	Gabpb2	Ptprh
	Mrpl17	Gal3st3	Sbk3
	Olfml1	Gcm1	Zbtb45
	Fbrs	Gdpgp1	Zc3h4
	Chst15	Gfra2	Nova2
	Adgra1	Gga2	Rsph6a
	F10	Ghdc	Cic
	Grk1	Gm10778	Ffar1
	Msr1	Gm4841	4931406B18Rik
	Tll1	Gm5615	Prr12
	Mau2	Gna13	Hrc
	Slc27a1	Gng2	Gm2115
	Slc35e1	Gnl3l	Olfr305
	Smim7	Gpalpp1	Uvrag
	Pllp	Gpi1	Olfr633
	Bean1	Gpr180	Trim12c
	Wwp2	Greb1	Lyrm1
	Vps9d1	Grik3	Apobr
	Nup133	Grk4	Tbc1d10b
	Msantd4	Gsk3b	Muc5b
	Smarca4	Haus2	Gm4559
	Spc24	Hcn1	Pomk
	Pigyl	Helb	Cbr4
	Bace1	Hspb7	Olfr374
	Sox14	Ift46	Rab8a
	Prss44	Igf1r	Rtbdn
	Prss43	Igf2	Cngb1
	Ltf	Il17ra	Ranbp10
	2010315B03Rik	Il18r1	Gm6793
	Zc3h12d	Impg2	Gse1
	Fyn	Intu	Ankrd11
	Pbld1	Itgb6	Slc35f3
	Ado	Itsn1	Elavl3
	Tmem26	Kank2	Gm10181
	Slc5a8	Kcnb1	Grik4
	Elk3	Kcnc1	Cyp19a1
	Avpr1a	Kcnj10	Foxb1
	Rbms2	Kcnj16	Pygo1
	Rnf41	Klhl24	Spsb4
	Sf3a1	Klhl31	Glyctk
	H2afv	Lpl	Rad54l2
	Olfr1393	Lpp	Col7a1
	Cdkn2aipnl	Maf	Ccr4
	Llgl1	Mafb	Sf3b5
	Kcnj12	Magt1	Ak9
	Shisa6	Mapkbp1	Prep
	Tmem220	Mcc	Gm2696
	Slc2a4	Med18	Gm10318
	Zzef1	Mkl2	Palm
	Evi2b	Mpv17	Btbd2
	Zfp385c	Mpv17l	Gm4302
	Dusp3	Mrc2	Rdh19
	Fam104a	Mrgpre	Ankrd52
	Ptrhd1	Mtfmt	Nipal4
	Npas3	Myh10	Fam71b
	Wdr89	Mylk4	Olfr1385
	Cep170b	N6amt1	Olfr323
	Cap2	Nat8f3	Olfr318
	Nop16	Ncbp3	Kdm6b
	Idnk	Ncl	Polr2a
	Naip5	Neurl1b	Nlgn2
	Fezf2	Nfat5	Pelp1
	Ercc6	Nip7	Olfr390
	Fam213a	Nol3	Hoxb1
	Rabggta	Nom1	Cntnap1
	Cbln3	Npbwr1	Mrps7
	Mrpl57	Nphs1	Foxg1
	Pnoc	Nucks1	Gm11042
	Elf1	Nufip2	Esr2
	Sema5a	Nus1	Acot1
	Zhx2	Nwd1	Bcl11b
	2010109I03Rik	Ostf1	Gm11027
	BC024139	Oxsm	Cmah
	Rac2	P2ry4	Sirt5
	Xpnpep3	P4ha3	Phf2
	Ttll1	Pappa2	Cplx2
	Scube1	Pcdh10	Eif4e1b
	Mapk11	Pcdh17	Hsd17b3
	Copz1	Pclo	Bhmt2
	Rrn3	Pde4c	Gm10408
	Ube2v2	Pdxk	Gm3278
	Lrrc58	Pfas	Gm3755
	Tmem242	Pgm2l1	Sema3g
	Tagap1	Pigh	Gm5460
	Ccdc78	Pigr	Mapk1ip1l
	Decr2	Pik3r5	Olfr221
	Mdga1	Pou3f3	Olfr1508
	Zfp799	Prdm8	Fam124a
	Ly6g6c	Prelid3a	Fam160b2
	Mdc1	Prpf4	Gm21750
	Enpp4	Prr11	Akap11
	Ptcra	Prrg3	Gm21961
	Rpl7l1	Psmb11	Myh9
	Bysl	Psmd9	Kmt2d
	Med20	Ptpn7	Umps
	Sh3rf2	Pum2	Zbtb20
	Ablim3	Rab11fip1	Olfr190
	Gm21992	Rab3c	Gm21833
	Bbs1	Rab9b	BC003965
	Cst6	Rad51c	Syngap1
	Dagla	Raph1	Olfr63
	Rfx3	Rassf2	Tnfrsf21
	Btrc	Rbbp4	AI661453
	Xk	Rbm34	Treml2
	Gla	Rgs17	Khsrp
	Phex	Rgs9bp	Lbh
	Prps2	Rnf11	Kcnk12
		Rnf165	Npc1
		Rorb	Cdc42bpg
		Rragd	Prpf19
		Rsad1	Foxb2
		Runx1t1	Rrp12
		Saa4	Mms19
		Saysd1	Abcc2
		Scd3	Sfxn3
		Sec22c	Sry
		Sema4b	Sh2d1a
		Sfrp1	Gm18336
		Sgms2	Lage3
		Sh2d2a	Pet2
		Sh3rf3	Pcdh19
		Shisa7	Amot
		Slc1a2	Lrch2
		Slc25a12	Iqsec2
		Slc25a42
		Slc35e2
		Slc3a2
		Slc6a20b
		Slc7a13
		Slc7a14
		Slc7a2
		Slco2a1
		Slfn5
		Smarca2
		Smco1
		Smtnl2
		Snx27
		Sod2
		Spock2
		Sppl2a
		Srgap3
		St6galnac5
		St8sia1
		Stk32b
		Strbp
		Syne1
		Sytl4
		Tacr1
		Taf3
		Tbc1d24
		Tbl1xr1
		Tceanc2
		Tfcp2l1
		Timm17b
		Tmc7
		Tmco1
		Tmem132b
		Tmem245
		Tnfrsf9
		Tns4
		Tox4
		Trappc13
		Trim43b
		Trmt10a
		Trmt61a
		Tspan15
		Tspan18
		Tspoap1
		Ttbk2
		Ttc26
		Tulp3
		Ubtf
		Ubxn2b
		Utp23
		Vangl2
		Vprbp
		Vps33b
		Vps37a
		Vwa7
		Wdr12
		Wdr26
		Wipf2
		Xpo7
		Xrcc3
		Ybey
		Zbtb8a
		Zfhx3
		Zfp11
		Zfp113
		Zfp12
		Zfp248
		Zfp26
		Zfp326
		Zfp37
		Zfp444
		Zfp46
		Zfp92
		Zmat3
		A530064D06Rik
		Serpine2
		Phactr4
		Exo1
		Bpifc
		Spata1
		Erg
		Pdlim7
		1700025G04Rik
		Lsm6
		Tnrc6b
		D10Wsu102e
		Pou2f2
		Zmym5
		Cand2
		Sox5

## Sheet: HFE vs HF
5 common in mRNA and miRNA target	28 common elements in "mRNA" and "miRNA target":	137 common in miRNA target and lncRNA target	26 common in mRNA and lncRNA target
Zbtb34	Xkr9	4921509C19Rik	Psmd5
Ncan	Stat1	Acsm2	Olfr1198
Ado	Mafb	Akap5	Alx4
Asb13	Wfdc12	Asah2	Olfr1276
Eif2ak2	Slc10a5	Asxl2	Olfr1310
	Gabrr1	Atf1	Scrt2
	Ugt2b35	Atf7	Dok5
	Mbd4	Bace1	Gm17402
	Cyb5r2	Bpifc	Lor
	Chst15	Braf	Lrp8
	Tll1	Bsn	Hif3a
	Nip7	Car10	Hrc
	Spc24	Ccdc25	Olfr633
	Ackr4	Ccr9	Usp17la
	Ltf	Cd33	Gm10217
	Ppil4	Cep97	Ccr4
	Zc3h12d	Cflar	4933415A04Rik
	Rpf2	Chic1	Med7
	Olfr1393	Chst2	Krt14
	Id2	Coa5	Rbm25
	Eif2s1	Col22a1	Serpina10
	Prl5a1	Creb5	Slc15a1
	Foxq1	Ctif	Olfr285
	Zfp935	Cx3cr1	Gm9918
	Clic5	Dennd5b	F830016B08Rik
	Zfp449	Dhdh	Lgi1
	Snx12	Diaph2
	Acsl4	Draxin
		Drp2
		Dzank1
		E2f1
		Elfn1
		Enah
		Epas1
		Fam160b2
		Fam212b
		Fbxl18
		Gabpb2
		Gabra2
		Gcm1
		Gm17174
		Gm4841
		Gmeb1
		Gpr180
		Grik3
		Gsk3b
		Hist4h4
		Hivep3
		Homer2
		Igf2
		Iws1
		Kank2
		Kcnj16
		Lhfpl4
		Lonrf1
		Lrrc61
		Maf
		Myh10
		Mylk4
		Nav2
		Ncbp3
		Ncl
		Neurl1b
		Neurod2
		Nfat5
		Nfia
		Nol3
		Npbwr1
		Ntrk3
		Nwd1
		Oxsm
		P4ha3
		Pbx1
		Pclo
		Pfas
		Pgm2l1
		Pi15
		Plxna4
		Pou3f3
		Prdm8
		Prrg3
		Pura
		Rab3c
		Rad51c
		Rapgefl1
		Raph1
		Rassf2
		Rgs9bp
		Rhobtb1
		Rsad1
		Runx2
		Runx3
		Saa4
		Satb2
		Sh2d2a
		Sh3rf3
		Slc7a11
		Slc7a2
		Slc8a2
		Slco2a1
		Smarca2
		Snx27
		Spock2
		St6galnac5
		St8sia1
		Strbp
		Stxbp6
		Tacr1
		Tet3
		Tmco1
		Tmem220
		Tmem245
		Tnrc6b
		Tns4
		Trim12c
		Trmt61a
		Tspan18
		Tspoap1
		Ubn2
		Ubtf
		Vangl2
		Vprbp
		Vps33b
		Wdr26
		Xylt1
		Ythdc2
		Zfhx3
		Zfp326
		Zfp46
		Zfp462
		Zfp839
		Zfp92
		Zmat3
		Cacfd1
		Dusp8
		Exo1
		Padi3
