# Supplementary material for: (−)-Epicatechin exerts positive effects on anxiety in high fat diet-induced obese mice through multi-genomic modifications in the hippocampus
Source: Royal Society of Chemistry journal article supplement (doi:10.1039/d2fo01897g), 2022-01-01

- **Supplemental figure and table legends.**
- **Supplementary Figure 1. Genomic modifications induced by consumption of the HFD in the hippocampus** A) Volcano plot representing the distribution of differentially expressed genes, mapping the up- (red) and down- (green) regulated genes in the hippocampus of HFD-fed mice when compared to those obtained from the hippocampus of control diet-fed mice. B) Pie chart of types of RNAs that are identified as differentially expressed. C) Histogram of a subset of significant gene pathways of differentially expressed protein-coding genes in the hippocampus of HFD-fed mice. D) Network of differentially expressed miRNAs (blue circles) and their target genes (yellow circles). Histogram of subset of significant gene pathways of E) miRNA target genes and F) lncRNA target genes identified in the hippocampus of HFD-fed mice compared to the ones identified in the control diet-fed mice. The most enriched top 30 pathways were identified using KEGG (\*). Additional KEGG (\*\*), Biocarta (\*\*\*) and WikiPathway (\*\*\*\*) pathways were identified using the Genetrial2 online database.

Supplemental Fig. 1A

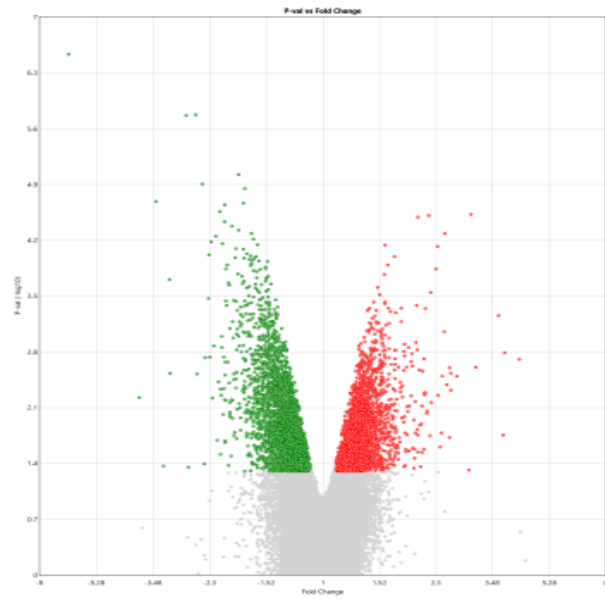

Supplemental Fig. 1B

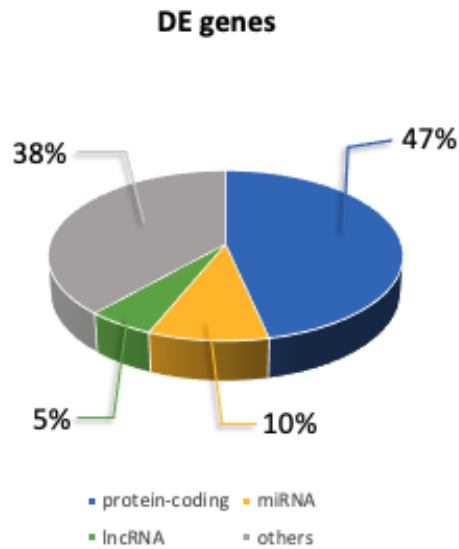

Supplemental Fig. 1C

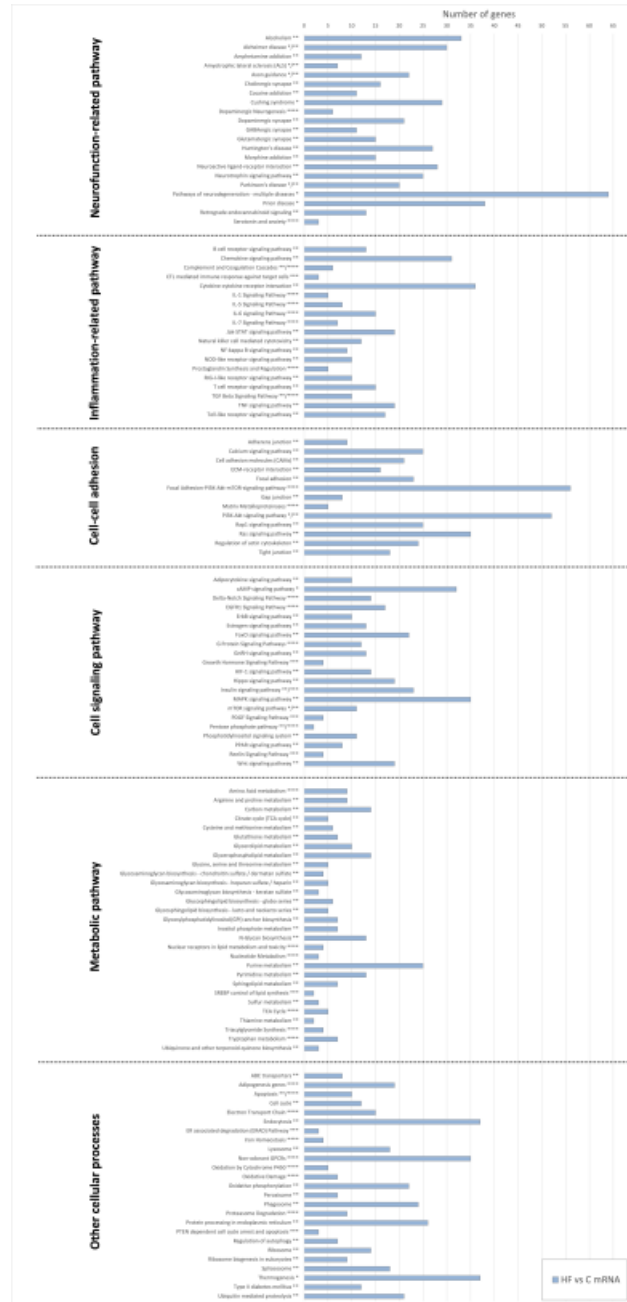



Supplemental Fig. 1F

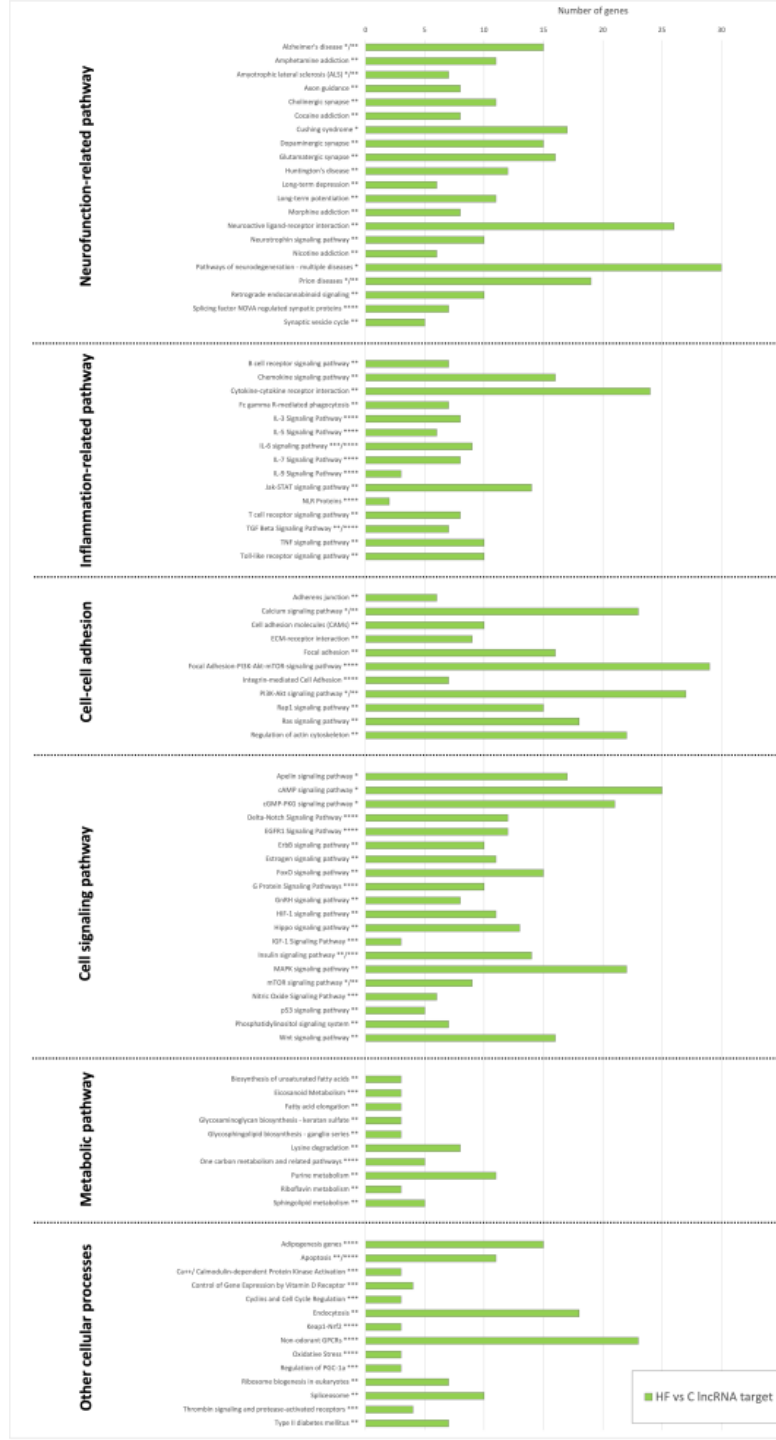

Supplement: d2fo01897g2.pdf [file d2fo01897g2.pdf]
